# Supplementary material
Source: PubMed Central journal article supplement (PMC3754831)
Supplement: NIHMS501116-supplement-Supp_Fig_S1-S4___Table_S1-S3.pdf [file NIHMS501116-supplement-Supp_Fig_S1-S4___Table_S1-S3.pdf]

```

SA KTRB      -MNKVHKP-----LYFYLMFFSTTIIGALLLYLPFTG 32
SA KTRD      -MSIFSQFLK-----RSSPQQGIVLYYIVAIVIAFLLLNLPYVH 38
BS KTRB      -MTLQKDK-----VIKVVRFPPQVLAIGFFLTIIIGAVLLMLPIST 41
BS KTRD      MRLKFGKLIQ-----ALSPAQLIALYFLAVTVAVILLSLPAAH 39
VA KTRB      -MTYFHQKGVFYAPDQKQEKAKGNEPRIILLSFGLVLLPSAVLLTLPVFS 49
          .          : : . . : ** **

SA KTRB      KK--PISFLDALFIASSAFTVTGLSPVDIGSQFNILGEIVILLIQLIGGL 80
SA KTRD      KPGVEVNPIDTLFVAVSGISVTCGLSPISIVDTYSTFGQLIILVILNIGGI 88
BS KTRB      TK--PLSWIDALFTAASATTVTGLAVVDTGTQFTVFGQTVIMGLIQLIGGL 89
BS KTRD      KPGADWTFIDALFTAASSVSVTGLTVVDTADTFSTIGIFILAFVLQFGGI 89
VA KTRB      VT--GLSITDALFTATS AISVTGLGVVDTGQHFTLAGKILLMFLMQIGGL 97
          .  *:* * * . :**** :. :. * : : : : : :

SA KTRB      GIVTVTLLTLVFLNRKISMKNRFLIMVTWNIDEPPGVIKLIKHLAIYSLV 130
SA KTRD      GVMAIGTMLWVVLGKHIGIRERQLIMLDNNKNTMSGTVKLIIDIVKSIFV 138
BS KTRB      GFMTFAVLIVMILGKKIGLKERMLVQEALNQPTIGGVIGLVKVLFLFSIS 139
BS KTRD      GIMTLGTFIWLIMGKRIGLKERKLMVDQNSQFSGIVNLMKQVLFILW 139
VA KTRB      GQMTLSAVLLYMFVRLSLRQALAKEALQDRQVNLNRLVKRIVVFAVL 147
          * : : . . : : : : : * . . * : : :

SA KTRB      TELIGMICLCLSFIPKFG-IGKGLFSLFTSVSAFNNA GFALFKNNLIDY 179
SA KTRD      IELVGAMLLAFYFYRDNPDLYAIMQGVFVSIATNGGLDITGKSLIPY 188
BS KTRB      IELIAALILSIRLVPQYG-WSSGLFASLFHAISAFNNA GFSLWPDNLSY 188
BS KTRD      IEFFGGLILGTYFLTYDYSYQEAYLHGFFASISATNGGFDITGNSMIPF 189
VA KTRB      AETIGFIFLSIRWVPEMG-WQTMFYALFHAISAFNNA GFALFSDSMSF 196
          * . . : * . : . * : : * . * : : : : :

SA KTRB      SSDPIVIITISILIIFGGIGHFVVIDFINCKK---LSKLSLHSKLVLT 225
SA KTRD      AHDYFVQAIIVIFLIILGSIGFPVLEVKAYIQNRVTNFRSLFTKITTST 238
BS KTRB      VGDPTVNLVITFLFITGGIGFTVLFVDMKNRR---FKTFSLHTKMLMTG 234
BS KTRD      RHDYFVQFITMLLIIFGAIGFPVLEVKDFLFSKHRRYPFTLFTKITTIA 239
VA KTRB      VNDPLVIFTLAGLFI FGGLGFTVVGD IWLNRK--GFHFLHLHTKIMLIA 244
          * * * : * * . * : : . : : * : : :

SA KTRB      TSILIIIGAITFFLLEQFN--TMQHMGLVEKIGNSFFQSVTTRTAGFN 273
SA KTRD      YLFLFIVGVLAILLFEHNN--AFKGLSWHQSLFYSLFQSATTRSAGLQTI 286
BS KTRB      TLMLNAIAMLTVFILEYSNPGTLGHLHIVDKLWASYFQAVTPRTAGFNSL 284
BS KTRD      FGSLVLFGAIGIFALEANH--AFAGKSWHDILFSLFQSTATRSGGLATI 287
VA KTRB      TPILLLVGTMLFWLLERSNPNTMASLPATGQWLAAFFQSASARTAGFNSV 294
          * . . : . : * : : : : : : * : : : : : :

SA KTRB      DIASINKSTALMLMLLMFIGGAPLSAAGGIKITTFAVAFIFVLNYIR--K 321
SA KTRD      DVTTLSDPTNIMGILMFIGSSPSSVGGGIRTTTFAILILFLINFSNNAD 336
BS KTRB      DFGSMREGTIVFTLLMFIGAGSASTASGIKLTTFIVILTSVIAYLR--G 332
BS KTRD      DISQLSDSTLFFICALMFIGASPSVGGGIRTTTFALNLLALFHFAR--G 335
VA KTRB      DLALFTQPALLVMIVMLLIGAGSTSTGGGIKVSTFAVAFMATWTFLR--Q 342
          * . : . : . * : * : . * : : : * : : : : .

SA KTRB      ENNVSVFNKEISDKHIKLSIVTINISFLFISITFILSIIN-PNISLIKL 370
SA KTRD      KTSIKVYNREVHIMDIQRSFAVFTMATILTFLGMLIISATENGKLTFLQV 386
BS KTRB      KKETVIFRRSIKYPYIIKALAVSVTSLFIVFLGIFALTIT--EQAPFLQI 380
BS KTRD      NKAVKVKRELHPADLMKSLVVTMMAILLVFGATLILTITE--KHSLEL 383
VA KTRB      KKHVVMFKRTINWQTVTKSLAIIVVSGAILTSAMFLLMLT--EKASFDKV 390
          : . : : : : : : : : : : : : : : :

SA KTRB      LFEVVSFAFGTVGLSMNLTTEYHGITKIIIFVMLCGKVGLLTLRFTFIPP 420
SA KTRD      FFEVMSAFGTCGLSLGVTSDISDISKVVLMLMFIGRVLISFIMIAGR 436
BS KTRB      VFETFSAFGTVGLTMGLTPELTTAGKCIIVIMFIGRIGPLTFVFSFAKT 430
BS KTRD      LFEVCSAFGTTGLSLGITADLSSVGKCVIMIVMFIGRIGILTFLYLIGRK 433
VA KTRB      MFETISAFATVGLTAGLTAELSEPGKYIMIVVMIIGRIGPLTAYMLARP 440
          . * . * * * * * : : : * : : : : * : : : : :

SA KTRB      KSPKNRYRTKQIYL- 435
SA KTRD      REPDKFHYPKERIQIG 452
BS KTRB      E-QSNIRYPDGEVFTG 445
BS KTRD      EIEANYHYPKERVIG 449
VA KTRB      E-PTLVKYPEDAULTG 455
          . : * . . :

```

**Fig. S1.** Alignment of Ktr ion-conducting proteins. Sequences from *Staphylococcus aureus* strain FPR3757 (SA), *Bacillus subtilis* strain 168 (BS), and *Vibrio alginolyticus* strain 12G01 (VA) were aligned using ClustalW2. Conserved K<sup>+</sup> selectivity filter glycine residues highlighted in blue. "\*" (asterisk) indicates a single, fully conserved amino acid. ":" (colon) indicates a group of strongly similar residues (> 0.5 in the Gonnet PAM 250 matrix). "." (period) indicates weakly similar properties (< 0.5 in the Gonnet PAM 250 matrix).

```

SA KTRA      MG----KEYVVIGLGRFGGSIRELNALDMDVMAIDHDENRVNEYSDIATHAVVADTTDE 56
BS KTRC      MK----KEFAVIGLGRFGGSICKALSEEGVEVMAMDIDEDKVNEYAKIASHAVIGDSTDE 56
BS KTRA      MGRIKNKQFAVIGLGRFGGSICKELHRMGHEVLAVDINEEKVNAYASYATHAVIANATEE 60
VA KTRA      MKTG-DKQFAVIGLGRFGLAVCKELQDSGPQVLAVDINEDRVKEAASFVSQAVVANCTHE 59
          *      *:::***** :: : *      . :*:*: * :*:*: :. :. :*:*: :. :*
          *      *:::***** :: : *      . :*:*: * :*:*: :. :. :*:*: :. :*

SA KTRA      AVMKSLGIRNFDHVIVAIGENIQSSTLTTLLIKELGVKKVTAKAQNDYHAKILNKIGADT 116
BS KTRC      SVLKNLGLRNFDHVIVAIGENIQASILTTTLLIKELGVHTITVKAQNDYHEKVLSKIGADH 116
BS KTRA      NELLSLGIRNFEYVIVAIGANIQASTLTTLLIKELDIPNIWVKAQNYYHHKVLEKIGADR 120
VA KTRA      ETVAELKLDDDYDMVMIAIGADVNASILATLIAKEAGVKSVWVKANDRFQARVLQKIGADH 119
          : . * : : : : * : : * * : : * * : : * * : : . : . * * : : : : * . * * * *

SA KTRA      VVHPERDMGRRIAHNVASASVLDYLELADEHSIVELKATEKMAGQSIIDLDIRAQYGINI 176
BS KTRC      IVHPERDMAKRIAHNIVSNNVLDYLELSEEHSIVEIVANSRLAGNTLLDDIRAKYGINI 176
BS KTRA      IIHPEKDMGVKIAQSLSDENVLNYIDLSDEYSIVELLATRKLDSKSIIDLNVRAKYGCTI 180
VA KTRA      IIMPERDMGIRVARKMLDKRVLEFHPLGSGLAMTEFVIGSRWMGKTLSDLALCKVDGVQV 179
          :: * : * * . : : * : : . * * : : * . : : . * : : : : * * : : * :

SA KTRA      IAIKRGKEFIISPNPNINLEIGDILIMIGHDNDLNRFEKNIATR- 220
BS KTRC      VAIKRGKEVIVSPLATEVIHQEDILIVIGSVTDISRFEKRVLHTK 221
BS KTRA      LAIKHHGDICLSPAPEDIIREQDCLVIMGHKKDIKRFENEGM--- 222
VA KTRA      LGFKRGPEITKAPDLNTTLEIGDLIIVVGPDALANKLKSL---- 220
          : : * : : . : * : : : * : : . : :

```

**Fig. S2.** Alignment of Ktr regulatory proteins. Sequences from *Staphylococcus aureus* strain FPR3757 (SA), *Bacillus subtilis* strain 168 (BS), and *Vibrio alginolyticus* strain 12G01 (VA) were aligned using ClustalW2. KTN/RCK domain is highlighted in blue. "\*" (asterisk) indicates a single, fully conserved amino acid. ":" (colon) indicates a group of strongly similar residues (> 0.5 in the Gonnet PAM 250 matrix). "." (period) indicates weakly similar properties (< 0.5 in the Gonnet PAM 250 matrix).

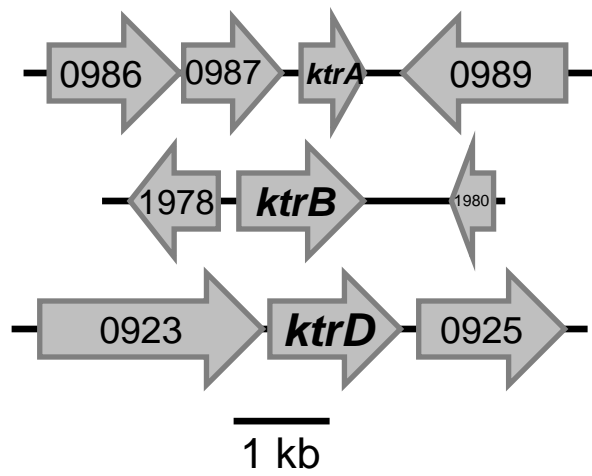

**Fig. S3:** Chromosomal organization of the *ktr* genes in *Staphylococcus aureus* strain FPR3757. Numbers represent locus ID.

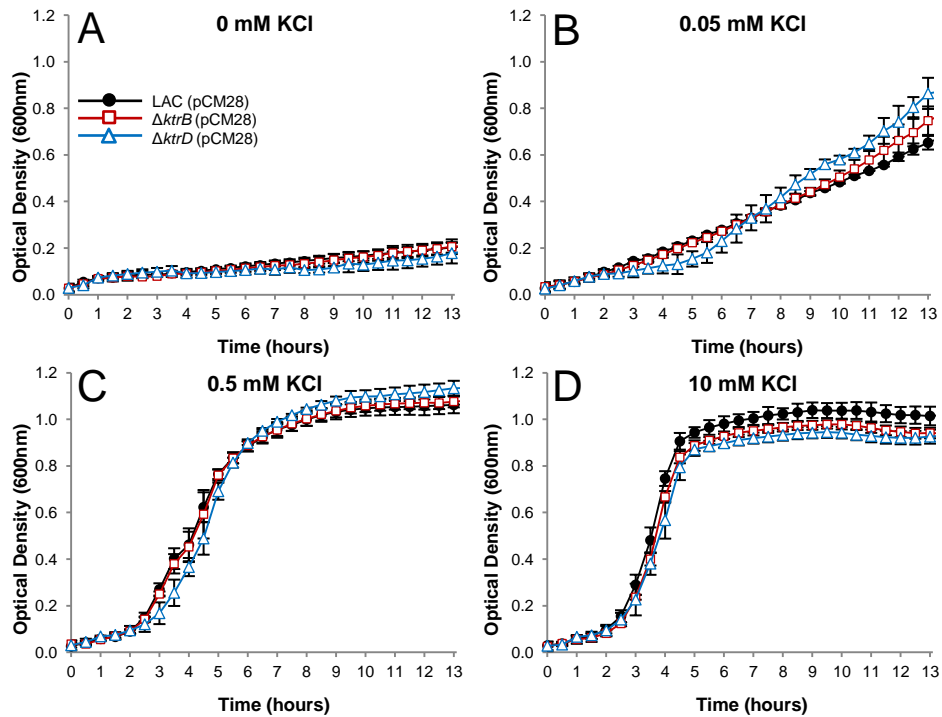

**Fig. S4.** Growth of *S. aureus* Ktr mutants in low K<sup>+</sup>. Wild-type *S. aureus* (solid black circles) and mutant strains  $\Delta ktrB$  (open red squares) and  $\Delta ktrD$  (open blue triangles) were inoculated from overnight cultures to OD<sub>600</sub>=0.05 in K-CDM supplemented with KCl to the desired concentration.

Data presented represent the mean of at least three independent experiments, with  $\pm$  standard error.

**Table S1.** Bacterial strains, plasmids, and oligonucleotide used in this study.

| Strain                           | Characteristics                                                                 | Source                            |
|----------------------------------|---------------------------------------------------------------------------------|-----------------------------------|
| <b><i>S. aureus</i></b>          |                                                                                 |                                   |
| LAC                              | Wild-type CA-MRSA (USA300) isolate                                              | (Voyich <i>et al.</i> , 2005)     |
| KB7004                           | LAC $\Delta ktrB$                                                               | This study                        |
| KB7005                           | LAC $\Delta ktrA$                                                               | This study                        |
| KB7006                           | LAC $\Delta ktrD$                                                               | This study                        |
| KB7007                           | LAC $\Delta ktrB \Delta ktrD$                                                   | This study                        |
| KB7008                           | LAC $\Delta kdpFABC$                                                            | This study                        |
| KB7009                           | LAC $\Delta ktrA \Delta kdpFABC$                                                | This study                        |
| JE2                              | LAC cured of plasmids LAC-p01 and LAC-p03                                       | (Fey <i>et al.</i> , 2013)        |
| <i>ktrA</i> :: $\Phi$ N $\Sigma$ | JE2 <i>ktrB</i> :: $\Phi$ N $\Sigma$                                            | This study                        |
| <i>ktrB</i> :: $\Phi$ N $\Sigma$ | JE2 <i>ktrA</i> :: $\Phi$ N $\Sigma$                                            | This study                        |
| <i>ktrD</i> :: $\Phi$ N $\Sigma$ | JE2 <i>ktrD</i> :: $\Phi$ N $\Sigma$                                            | This study                        |
| RN4220                           | Highly transformable restriction-deficient strain                               | (Kreiswirth <i>et al.</i> , 1983) |
| <b>Plasmids</b>                  |                                                                                 |                                   |
| pCM28                            | Complementing vector, <i>ampR</i> , <i>chmR</i>                                 | (Pang <i>et al.</i> , 2010)       |
| pCL52.2                          | Temperature sensitive Staphylococcal shuttle vector, <i>tetR</i> , <i>specT</i> | (Sau <i>et al.</i> , 1997)        |
| pJB38                            | Temperature sensitive Staphylococcal shuttle vector, <i>ampR</i> , <i>chmR</i>  | (Bose <i>et al.</i> , 2013)       |
| pCG31                            | <i>ktrB</i> complement plasmid, created using CG37 and CG38                     | This study                        |
| pCG32                            | <i>ktrB</i> allelic exchange plasmid, created using CG51/52 and CG53/54         | This study                        |
| pCG33                            | <i>ktrA</i> complement plasmid, created using CG39 and CG40                     | This study                        |
| pCG34                            | <i>ktrA</i> allelic exchange plasmid, created using CG55/56 and CG57/58         | This study                        |
| pCG35                            | <i>ktrD</i> complement plasmid, created using CG41 and CG42                     | This study                        |
| pCG36                            | <i>ktrD</i> allelic exchange plasmid, created using CG27/28 and CG29/31         | This study                        |
| pCG37                            | <i>kdpFABC</i> complement plasmid, created using CG74 and CG75                  | This study                        |
| pCG38                            | <i>kdpFABC</i> allelic exchange plasmid, created using CG 70/71 and CG 72/73    | This study                        |
| <b>Oligonucleotides</b>          |                                                                                 |                                   |
| CG27                             | CCGAGCTCGCTCAAAAATATACGACAACGATGAAAAAT                                          | This study                        |
| CG28                             | CCGGATCCCACGTTGTTACACCTCAACATTATTTTAGTTTAATATTAATTT                             | This study                        |
| CG29                             | CCGGATCCTAATATAATAGCAATCTAAGTTTAGTTAATGTAGATTTAACTGGA                           | This study                        |
| CG31                             | CCGTCGACGATCCTCTTCATACTCATTAAAGTCA                                              | This study                        |
| CG37                             | GGGAGCTCCCATAGCATCTACAACAATTAATCTGGTTT                                          | This study                        |
| CG38                             | GGGAATTCTTATAGATAAATTTGTCCTTTAGTGTAGCGGTAAT                                     | This study                        |
| CG39                             | GGGAGCTCTATCATTACGCATTCAAATTCTGAACAT                                            | This study                        |
| CG40                             | GGGAATTCTTATCTCGTCGCAATATTTTTTCAAAGCGA                                          | This study                        |
| CG41                             | GGGAGCTCAATTGATGCATCAGTAAATCCAGGTAAT                                            | This study                        |
| CG42                             | GGGAATTCTTATCCTATTTGAATACGTTCTTTTGGATAATGGAA                                    | This study                        |
| CG51                             | CCGAGCTCATAATCTTCTGCTTTATATGAA                                                  | This study                        |
| CG52                             | GGGGATCCCATTTTAATTTTCATACTCCTTT                                                 | This study                        |
| CG53                             | CCGGATCCTAAAATAACTATCCATCTTTAA                                                  | This study                        |
| CG54                             | GGGTCGACAGCTGATTCTGAAGAATTTTCT                                                  | This study                        |
| CG55                             | CCGAGCTCTTTAAACCCAGTTTGGGAAGTT                                                  | This study                        |
| CG56                             | GGGGATCCCATACTCGCCCTCCATTAATG                                                   | This study                        |
| CG57                             | CCGGATCCTAATCGGGAGTGGGACAGAAAT                                                  | This study                        |
| CG58                             | GGGTCGACTAAAGCTGGTGCAGATGTTATC                                                  | This study                        |
| CG70                             | CCGAGCTCACTTGCTTTTACTATCTTT                                                     | This study                        |
| CG71                             | GGGGATCCCATCGTAACAACCTTGTTTAT                                                   | This study                        |
| CG72                             | CCGGATCCTGATTATAGATGAAAGGCAT                                                    | This study                        |

|      |                               |            |
|------|-------------------------------|------------|
| CG73 | GGGTCGACGACCCCTTGTGTCATATCAA  | This study |
| CG74 | GGGAGCTCTTCTTCAATATCCATATATCG | This study |
| CG75 | GGGAATTCTCAATCTTTCATCTTATCAAG | This study |

**a.** Antibiotic resistance abbreviations used: *ampR*, ampicillin resistance (*bla*); *chmR*, chloramphenicol resistance; *tetR*, tetracycline resistance (*tetM*), and *specR*, spectinomycin resistance.

**b.** Oligonucleotides sequences are provided in the 5'-3' orientation. Italics indicate non-homologous sequences added for cloning.

## References

- Bose, J.L., P.D. Fey & K.W. Bayles, (2013) Genetic tools to enhance the study of gene function and regulation in *Staphylococcus aureus*. *Applied and environmental microbiology* **79**: 2218-2224.
- Fey, P.D., J.L. Endres, V.K. Yajjala, T.J. Widhelm, R.J. Boissy, J.L. Bose & K.W. Bayles, (2013) A genetic resource for rapid and comprehensive phenotype screening of nonessential *Staphylococcus aureus* genes. *mBio* **4**: e00537-00512.
- Kreiswirth, B.N., S. Lofdahl, M.J. Betley, M. O'Reilly, P.M. Schlievert, M.S. Bergdoll & R.P. Novick, (1983) The toxic shock syndrome exotoxin structural gene is not detectably transmitted by a prophage. *Nature* **305**: 709-712.
- Pang, Y.Y., J. Schwartz, M. Thoendel, L.W. Ackermann, A.R. Horswill & W.M. Nauseef, (2010) agr-Dependent interactions of *Staphylococcus aureus* USA300 with human polymorphonuclear neutrophils. *Journal of innate immunity* **2**: 546-559.
- Sau, S., J. Sun & C.Y. Lee, (1997) Molecular characterization and transcriptional analysis of type 8 capsule genes in *Staphylococcus aureus*. *Journal of bacteriology* **179**: 1614-1621.
- Voyich, J.M., K.R. Braughton, D.E. Sturdevant, A.R. Whitney, B. Said-Salim, S.F. Porcella, R.D. Long, D.W. Dorward, D.J. Gardner, B.N. Kreiswirth, J.M. Musser & F.R. DeLeo, (2005) Insights into mechanisms used by *Staphylococcus aureus* to avoid destruction by human neutrophils. *Journal of immunology* **175**: 3907-3919.

**Table S2.** Locus ID and accession numbers of Ktr proteins.

|                                     | KtrA                   | KtrB                   | KtrD                   |
|-------------------------------------|------------------------|------------------------|------------------------|
| <i>S. aureus</i> USA300_FPR3757     | 0988 (YP_493686)       | 1979 (YP_494630)       | 0924 (YP_493624)       |
| <i>S. epidermidis</i> ATCC 12228    | 0786 (NP_764341)       | 0571 (NP_764126)       | 0724 (NP_764279)       |
| <i>S. haemolyticus</i> JCSC1435     | 1867 (YP_253782)       | 2567 (YP_254482)       | 1935 (YP_253850)       |
| <i>S. lugdunensis</i> HKU09-01      | 1788<br>(YP_003472005) |                        | 1845<br>(YP_003472060) |
| <i>S. saprophyticus</i> ATCC 15305  | 1703 (YP_301793)       | 2353 (YP_302443)       | 1762 (YP_301852)       |
| <i>S. carnosus</i> TM300            | 0709<br>(YP_002633805) | 0441<br>(YP_002633540) | 0626<br>(YP_002633723) |
| <i>S. pseudintermedius</i> HKU10-03 | 0795<br>(YP_004148959) | 0870<br>(YP_004149034) | 0719<br>(YP_004148883) |

**Table S3.** Contribution of pH to antibiotic MIC.

| <b>A</b> Gentamicin MIC values ( $\mu\text{g/mL}$ ) |             |                       |
|-----------------------------------------------------|-------------|-----------------------|
| pH                                                  | LAC (pCM28) | $\Delta ktrA$ (pCM28) |
| 5.35                                                | >16         | 16                    |
| 7.01                                                | 4           | 1                     |
| 8.0                                                 | 1           | .25                   |
| 9.08                                                | .5          | NG                    |

  

| <b>B</b> Polymyxin B MIC values ( $\mu\text{g/mL}$ ) |             |                       |
|------------------------------------------------------|-------------|-----------------------|
| pH                                                   | LAC (pCM28) | $\Delta ktrA$ (pCM28) |
| 5.35                                                 | >64         | >64                   |
| 7.01                                                 | >64         | 64                    |
| 8.0                                                  | 64          | 8                     |
| 9.08                                                 | 32          | NG                    |

  

| <b>C</b> HNP-1 MIC values ( $\mu\text{M}$ ) |             |                       |
|---------------------------------------------|-------------|-----------------------|
| pH                                          | LAC (pCM28) | $\Delta ktrA$ (pCM28) |
| 5.35                                        | >5          | >5                    |
| 7.01                                        | >5          | >5                    |
| 8.0                                         | >5          | 1.25                  |
| 9.08                                        | 2.5         | NG                    |

- a.** MIC values reported are the concentration of antibiotic in which no growth was seen following 20 hrs of static incubation at 37°C.
- b.** Results are representative of at least two independent experiments.
- c.** NG=no growth detectable for  $\Delta ktrA$  in 0.5 mM KCl pH 9.08
